# Supplementary material
Source: Springer Nature journal article supplement (https://www.springermedizin.de/resource/supplementary/13601_2012_292_MOESM6_ESM.pdf/9677824)

**a****eotaxin**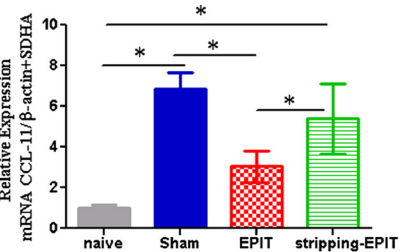**b****IL-5**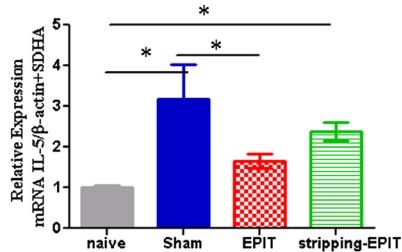**c****IL-13**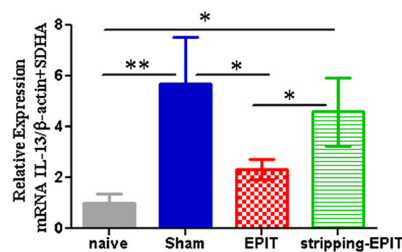**d****T-bet**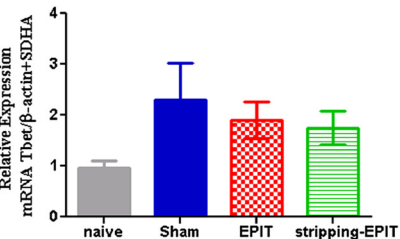**e****GATA-3**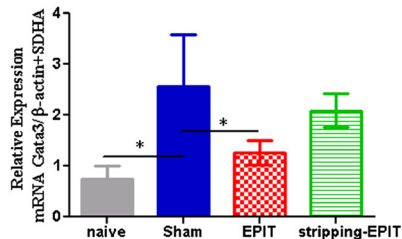**f****FoxP3**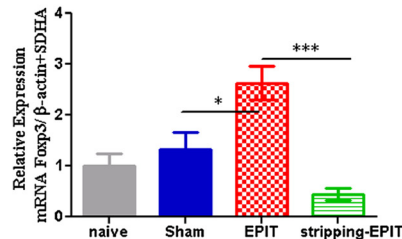

Supplement: MOESM6 [file 9677824]
